# Supplementary material
Source: Springer Nature journal article supplement (https://www.springermedizin.de/resource/supplementary/12969_2013_995_MOESM1_ESM.pdf/9589176)
Supplement: MOESM1 [file 9589176]

| Outcome measure                                                | First assessment<br>mean (SD)<br>(n=26) | Second assessment<br>mean (SD)<br>(n=26) | p-value |
|----------------------------------------------------------------|-----------------------------------------|------------------------------------------|---------|
| <b>Primary Outcome Measures</b>                                |                                         |                                          |         |
| Child's report of mean knee pain over the week <sup>1</sup>    | 40.58 (18.97)                           | 38.01 (14.74)                            | 0.47    |
| Child's report of maximum knee pain over the week <sup>1</sup> | 58.06 (23.72)                           | 52.85 (23.26)                            | 0.34    |
| <b>Secondary Outcome Measures</b>                              |                                         |                                          |         |
| <i>Child Reported Measures</i>                                 |                                         |                                          |         |
| PGIC Change <sup>2</sup>                                       | N/A                                     | 0.23 (1.04)                              | N/A     |
| CHAQ 38 <sup>3</sup>                                           | -0.04 (0.57)                            | -0.05 (0.59)                             | 0.86    |
| Overall lower limb strength (N)                                | 3.90 (2.03)                             | 4.48 (2.29)                              | 0.08    |
| No. of flights of stairs ran in 2 minutes                      | 17.93 (5.53)                            | 19.26 (6.19)                             | 0.06    |
| <i>Parent Reported Measures (CHQ-PF50)<sup>4</sup></i>         |                                         |                                          |         |
| Physical Summary Score                                         | 36.28 (15.65)                           | 37.34 (11.20)                            | 0.65    |
| Psychosocial Summary Score                                     | 44.90 (11.60)                           | 47.73 (10.89)                            | 0.03*   |
| Physical Functioning                                           | 70.49 (24.2)                            | 72.94 (20.08)                            | 0.41    |
| Role limitations – emotional and behavioural                   | 76.39 (30.17)                           | 89.58 (20.51)                            | 0.02*   |
| Role limitations - physical                                    | 71.53 (33.34)                           | 69.79 (31.60)                            | 0.78    |
| Bodily Pain                                                    | 39.79 (23.17)                           | 44.58 (16.12)                            | 0.28    |
| Behaviour                                                      | 70.34 (17.25)                           | 73.06 (13.06)                            | 0.23    |
| Mental Health                                                  | 70.42 (17.58)                           | 71.77 (16.31)                            | 0.48    |
| Self Esteem                                                    | 66.87 (19.21)                           | 65.13 (21.93)                            | 0.55    |
| General Health                                                 | 63.82 (20.20)                           | 64.66 (16.92)                            | 0.77    |
| Parental Emotional Impact                                      | 53.93 (28.54)                           | 60.12 (28.94)                            | 0.34    |
| Parental Time Impact                                           | 80.16 (26.69)                           | 86.51 (20.55)                            | 0.09    |
| Family Activities                                              | 68.11 (28.95)                           | 72.19 (26.96)                            | 0.20    |

|                 |               |               |      |
|-----------------|---------------|---------------|------|
| Family Cohesion | 67.02 (28.09) | 75.12 (23.07) | 0.14 |
|-----------------|---------------|---------------|------|

<sup>1</sup> Using 2 separate 0 - 100mm VAS's, a higher score depicts more pain

<sup>2</sup> Patient's Global Impression of Change (PGIC)

<sup>3</sup> Child Health Assessment Questionnaire – 38 question version (CHAQ-38)

<sup>4</sup> Child Health Questionnaire (CHQ)

\*p<0.05 statistically significant
